# Supplementary material
Source: Springer Nature journal article supplement (https://www.springermedizin.de/resource/supplementary/12916_2012_711_MOESM1_ESM.pdf/9598732)
Supplement: MOESM1 [file 9598732]

Absorbance at 405nm

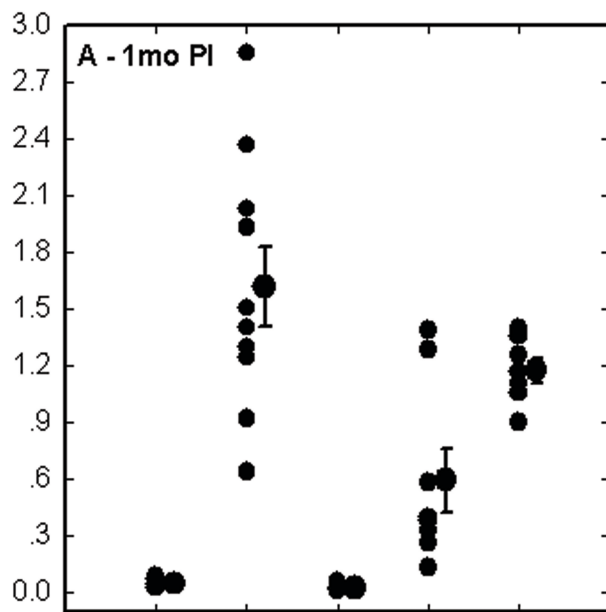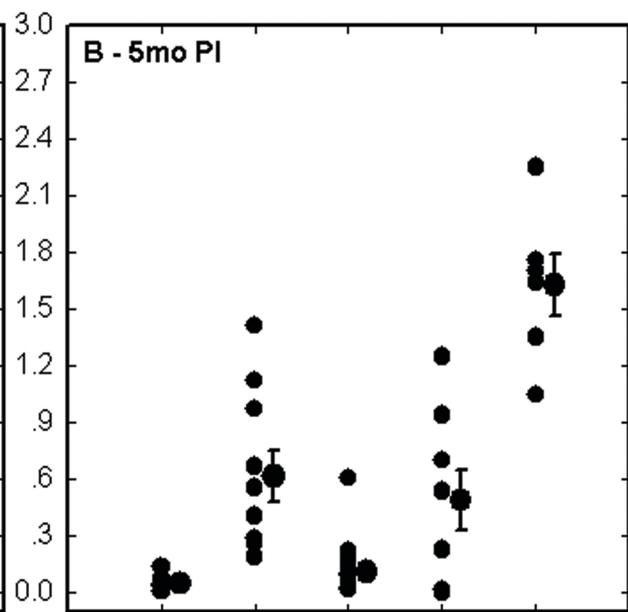

FVL +/+ -control  
FVL +/+ -APS  
FVL Q/+ -control  
FVL Q/+ -APS  
FVLQ/Q -APS

FVL +/+ -control  
FVL +/+ -APS  
FVL Q/+ -control  
FVL Q/+ -APS  
FVLQ/Q -APS
